# Supplementary material for: Genetic regulation of salt stress tolerance revealed by RNA-Seq in cotton diploid wild species, Gossypium davidsonii
Source: PubMed Central journal article supplement (PMC4738326; doi:10.1038/srep20582), 2016-02-03
Supplement: srep20582-s1.pdf [file srep20582-s1.pdf]

**Genetic regulation of salt stress tolerance revealed by RNA-Seq in cotton diploid wild species, *Gossypium davidsonii***

Feng Zhang<sup>1,+</sup>, Guozhong Zhu<sup>1,+</sup>, Lei Du<sup>1</sup>, Xiaoguang Shang<sup>1</sup>, Chaoze Cheng<sup>1</sup>, Bing Yang<sup>2</sup>, Yan Hu<sup>1</sup>, Caiping Cai<sup>1</sup>, Wangzhen Guo<sup>1,\*</sup>

<sup>1</sup>State Key Laboratory of Crop Genetics & Germplasm Enhancement, Hybrid Cotton R & D Engineering Research Center, Ministry of Education, Nanjing Agricultural University, Nanjing 210095, China

<sup>2</sup>Yunnan Ice Harbor Biotechnology Co. Ltd, Kunming 650000, China

<sup>+</sup> These authors contributed equally to this work

<sup>\*</sup> Correspondence and requests for materials should be addressed to W.Z.G. (email: moelab@njau.edu.cn)

**Table S1. Mapping result of RNA-Seq reads**

| Sample  | Raw reads (M) | Clean reads (M) | Mapped reads (M) | Mapping rate |
|---------|---------------|-----------------|------------------|--------------|
| RC12-1  | 24.0          | 23.2            | 17.1             | 73.76%       |
| RC12-2  | 27.1          | 26.2            | 19.1             | 72.89%       |
| RS12-1  | 64.3          | 61.5            | 44.6             | 72.63%       |
| RS12-2  | 14.6          | 13.7            | 10.2             | 74.74%       |
| RC24-1  | 21.2          | 20.7            | 15.2             | 73.18%       |
| RC24-2  | 32.1          | 30.5            | 23.9             | 78.36%       |
| RS24-1  | 32.6          | 31.2            | 22.5             | 72.26%       |
| RS24-2  | 21.8          | 20.6            | 14.7             | 71.14%       |
| RC48-1  | 36.9          | 35.7            | 26.1             | 72.93%       |
| RC48-2  | 22.0          | 21.2            | 15.3             | 72.18%       |
| RS48-1  | 72.8          | 71.5            | 52.8             | 73.92%       |
| RS48-2  | 19.9          | 19.5            | 14.1             | 72.30%       |
| RC96-1  | 86.7          | 84.1            | 61.2             | 72.77%       |
| RC96-2  | 21.1          | 20.4            | 14.6             | 71.61%       |
| RS96-1  | 137.6         | 134.9           | 97.2             | 72.07%       |
| RS96-2  | 21.4          | 20.5            | 12.5             | 60.88%       |
| RC144-1 | 29.5          | 28.2            | 20.0             | 70.94%       |
| RC144-2 | 33.7          | 32.1            | 23.7             | 73.99%       |
| RS144-1 | 47.8          | 46.1            | 32.9             | 71.53%       |
| RS144-2 | 33.5          | 32.1            | 23.5             | 73.18%       |
| LC12-1  | 37.9          | 35.7            | 30.2             | 84.47%       |
| LC12-2  | 42.3          | 40.1            | 32.9             | 82.11%       |
| LS12-1  | 39.3          | 37.9            | 29.8             | 78.55%       |
| LS12-2  | 23.3          | 21.4            | 16.0             | 75.00%       |
| LC24-1  | 15.7          | 14.1            | 10.7             | 75.78%       |
| LC24-2  | 22.2          | 20.0            | 15.1             | 75.58%       |
| LS24-1  | 32.4          | 30.6            | 25.6             | 83.70%       |
| LS24-2  | 27.8          | 26.4            | 21.9             | 82.88%       |
| LC48-1  | 14.1          | 12.7            | 9.3              | 73.41%       |
| LC48-2  | 35.2          | 32.9            | 24.3             | 74.04%       |
| LS48-1  | 77.2          | 73.0            | 58.6             | 80.32%       |
| LS48-2  | 41.5          | 39.5            | 32.4             | 82.00%       |
| LC96-1  | 21.7          | 20.1            | 13.4             | 66.67%       |
| LC96-2  | 180.8         | 176.6           | 126.6            | 71.67%       |
| LS96-1  | 39.1          | 36.5            | 21.8             | 59.74%       |
| LS96-2  | 43.3          | 40.4            | 30.4             | 75.40%       |
| LC144-1 | 32.9          | 29.1            | 21.2             | 72.78%       |
| LC144-2 | 53.3          | 47.0            | 34.3             | 72.86%       |
| LS144-1 | 42.4          | 40.7            | 30.8             | 75.87%       |
| LS144-2 | 64.4          | 61.9            | 47.6             | 76.92%       |

**RC and RS: root well-watered and salt treatment, respectively; LC and LS: leaf well-watered and salt treatment, respectively.**

**Table S2. GO terms related to stimulus or stress.**

| Term                                       | R12 | R24 | R48 | R96 | R144 | L12 | L24 | L48 | L96 | L144 |
|--------------------------------------------|-----|-----|-----|-----|------|-----|-----|-----|-----|------|
| response to osmotic stress                 | 75  | 81  | 31  | 21  | 18   | 11  | 15  | 45  | 60  | 70   |
| response to oxidative stress               | 65  | 63  | 19  | 19  | 15   | 8   | 11  | 38  | 31  | 54   |
| response to starvation                     | 31  | 30  | 9   | 13  | 9    | 0   | 0   | 13  | 14  | 19   |
| response to water deprivation              | 51  | 51  | 23  | 15  | 16   | 9   | 9   | 32  | 41  | 35   |
| cation transport                           | 56  | 69  | 34  | 29  | 14   | 6   | 10  | 37  | 53  | 84   |
| inorganic anion transport                  | 32  | 28  | 16  | 25  | 21   | 0   | 0   | 10  | 23  | 21   |
| monovalent inorganic cation transport      | 10  | 16  | 7   | 0   | 0    | 0   | 0   | 11  | 14  | 26   |
| di-, tri-valent inorganic cation transport | 28  | 32  | 16  | 16  | 8    | 6   | 8   | 24  | 30  | 38   |
| metal ion transport                        | 47  | 53  | 24  | 22  | 12   | 6   | 9   | 29  | 41  | 58   |
| nitrate transport                          | 27  | 30  | 14  | 18  | 16   | 0   | 0   | 7   | 14  | 15   |
| response to abscisic acid stimulus         | 65  | 75  | 29  | 16  | 23   | 9   | 12  | 40  | 51  | 48   |
| response to ethylene stimulus              | 36  | 37  | 18  | 14  | 18   | 0   | 5   | 23  | 26  | 30   |
| response to hormone stimulus               | 125 | 126 | 53  | 41  | 46   | 13  | 16  | 80  | 103 | 101  |
| response to jasmonic acid stimulus         | 49  | 58  | 22  | 21  | 24   | 7   | 9   | 29  | 37  | 51   |
| response to salicylic acid stimulus        | 40  | 49  | 17  | 17  | 20   | 5   | 5   | 26  | 29  | 47   |
| response to chitin                         | 55  | 53  | 15  | 24  | 34   | 0   | 0   | 19  | 31  | 36   |
| response to sucrose stimulus               | 14  | 27  | 9   | 9   | 11   | 0   | 5   | 18  | 29  | 36   |

**The numbers in table indicate the differential expression genes in root (R) and leaf (L) at five time points.**

**Table S3. Mapman bins of photosynthetic pathway**

| <b>Bin</b> | <b>Name</b>                                                              | <b>Elements</b> | <b>P-value</b> |
|------------|--------------------------------------------------------------------------|-----------------|----------------|
| 1          | PS                                                                       | 155             | 4.36E-25       |
| 1.1        | PS.lightreaction                                                         | 120             | 2.52E-24       |
| 1.1.1      | PS.lightreaction.photosystem II                                          | 51              | 6.97E-14       |
| 1.1.1.1    | PS.lightreaction.photosystem II.LHC-II                                   | 18              | 1.09E-04       |
| 1.1.1.2    | PS.lightreaction.photosystem II.PSII polypeptide subunits                | 33              | 1.26E-10       |
| 1.1.2      | PS.lightreaction.photosystem I                                           | 26              | 1.56E-05       |
| 1.1.2.1    | PS.lightreaction.photosystem I.LHC-I                                     | 2               | 1.62E-01       |
| 1.1.2.2    | PS.lightreaction.photosystem I.PSI polypeptide subunits                  | 24              | 4.28E-05       |
| 1.1.3      | PS.lightreaction.cytochrome b6/f                                         | 6               | 1.90E-03       |
| 1.1.3.1    | PS.lightreaction.cytochrome b6/f.iron sulfur subunit                     | 1               | 9.80E-01       |
| 1.1.3.2    | PS.lightreaction.cytochrome b6/f.subunit 4 (PETD)                        | 1               | 1.91E-01       |
| 1.1.3.3    | PS.lightreaction.cytochrome b6/f.cytochrome b6 (CYB6)                    | 2               | 2.54E-02       |
| 1.1.4      | PS.lightreaction.ATP synthase                                            | 9               | 1.17E-03       |
| 1.1.4.1    | PS.lightreaction.ATP synthase.alpha subunit                              | 1               | 7.97E-02       |
| 1.1.4.3    | PS.lightreaction.ATP synthase.epsilon chain                              | 1               | 1.67E-01       |
| 1.1.4.4    | PS.lightreaction.ATP synthase.gamma chain                                | 1               | 1.74E-01       |
| 1.1.4.5    | PS.lightreaction.ATP synthase.subunit C                                  | 1               | 9.45E-02       |
| 1.1.4.6    | PS.lightreaction.ATP synthase.chloroplastic subunit a                    | 2               | 1.87E-02       |
| 1.1.4.7    | PS.lightreaction.ATP synthase.delta chain                                | 1               | 2.34E-01       |
| 1.1.4.8    | PS.lightreaction.ATP synthase.subunit B (ATPF)                           | 1               | 8.13E-02       |
| 1.1.40     | PS.lightreaction.cyclic electron flow-chlororespiration                  | 10              | 9.60E-02       |
| 1.1.5      | PS.lightreaction.other electron carrier (ox/red)                         | 11              | 8.20E-02       |
| 1.1.5.2    | PS.lightreaction.other electron carrier (ox/red).ferredoxin              | 7               | 3.26E-01       |
| 1.1.5.3    | PS.lightreaction.other electron carrier (ox/red).ferredoxin reductase    | 3               | 6.99E-02       |
| 1.1.5.4    | PS.lightreaction.other electron carrier (ox/red).ferredoxin oxireductase | 1               | 9.80E-01       |
| 1.1.6      | PS.lightreaction.NADH DH                                                 | 7               | 1.16E-02       |
| 1.2        | PS.photorespiration                                                      | 9               | 2.19E-01       |
| 1.2.2      | PS.photorespiration.glycolate oxydase                                    | 3               | 7.51E-01       |
| 1.2.3      | PS.photorespiration.aminotransferases peroxisomal                        | 1               | 9.80E-01       |
| 1.2.4      | PS.photorespiration.glycine cleavage                                     | 2               | 1.20E-01       |
| 1.2.4.4    | PS.photorespiration.glycine cleavage.H protein                           | 2               | 1.20E-01       |
| 1.2.6      | PS.photorespiration.hydroxypyruvate reductase                            | 1               | 3.07E-01       |
| 1.2.7      | PS.photorespiration.glycerate kinase                                     | 1               | 9.80E-01       |
| 1.3        | PS.calvin cycle                                                          | 26              | 1.05E-02       |
| 1.3.1      | PS.calvin cycle.rubisco large subunit                                    | 5               | 1.27E-04       |
| 1.3.11     | PS.calvin cycle.RPE                                                      | 1               | 9.80E-01       |
| 1.3.12     | PS.calvin cycle.PRK                                                      | 1               | 2.68E-01       |
| 1.3.13     | PS.calvin cycle.rubisco interacting                                      | 2               | 8.03E-01       |
| 1.3.2      | PS.calvin cycle.rubisco small subunit                                    | 3               | 9.65E-01       |
| 1.3.4      | PS.calvin cycle.GAP                                                      | 5               | 6.31E-01       |
| 1.3.5      | PS.calvin cycle.TPI                                                      | 1               | 9.80E-01       |
| 1.3.6      | PS.calvin cycle.aldolase                                                 | 1               | 1.33E-01       |
| 1.3.7      | PS.calvin cycle.FBPase                                                   | 5               | 1.66E-01       |
| 1.3.8      | PS.calvin cycle.transketolase                                            | 1               | 9.80E-01       |

**Table S4. Mapman bins of redox pathway**

| <b>Bin</b> | <b>Name</b>                                                                                        | <b>Elements</b> | <b>P-value</b> |
|------------|----------------------------------------------------------------------------------------------------|-----------------|----------------|
| 21         | redox                                                                                              | 56              | 1.02E-02       |
| 21.1       | redox.thioredoxin                                                                                  | 16              | 3.32E-01       |
| 21.1.1     | redox.thioredoxin.PDIL                                                                             | 1               | 2.28E-01       |
| 21.2       | redox.ascorbate and glutathione                                                                    | 13              | 1.49E-01       |
| 21.2.1     | redox.ascorbate and glutathione.ascorbate                                                          | 6               | 1.23E-01       |
| 21.2.1.2   | redox.ascorbate and glutathione.ascorbate. GDP-L-galactose-hexose-1-phosphate<br>guanyltransferase | 1               | 2.38E-01       |
| 21.2.2     | redox.ascorbate and glutathione.glutathione                                                        | 2               | 2.99E-01       |
| 21.3       | redox.heme                                                                                         | 1               | 9.80E-01       |
| 21.4       | redox.glutaredoxins                                                                                | 19              | 1.41E-01       |
| 21.5       | redox.peroxiredoxin                                                                                | 3               | 8.29E-01       |
| 21.5.1     | redox.peroxiredoxin.BAS1                                                                           | 1               | 3.49E-01       |
| 21.6       | redox.dismutases and catalases                                                                     | 4               | 1.06E-01       |

**Table S5. Statistics of alternative splicing categories from RNA-Seq data**

| Category | Event No. | Event ratio (%) | Gene No. | Gene ratio (%) <sup>a</sup> | Events per gene |
|----------|-----------|-----------------|----------|-----------------------------|-----------------|
| AA       | 4146      | 29.25           | 3065     | 45.09                       | 1.35            |
| AD       | 1809      | 12.76           | 1526     | 22.45                       | 1.19            |
| ES       | 1093      | 7.71            | 888      | 13.06                       | 1.23            |
| IR       | 5063      | 35.73           | 3492     | 51.37                       | 1.45            |
| others   | 2061      | 14.54           | 1171     | 17.23                       | 1.76            |
| total    | 14172     | 100             | 6798     | 149.19                      | 2.08            |

<sup>a</sup> Many genes utilize multiple splicing categories, causing percentages to sum to greater than 100.

**Table S6. Primers used for qRT-PCR to validate the correlation with RNA-Seq**

| Gene ID                 | Transcripts level under salt stress vs. CK | Primers for qRT-PCR(5'-3')                         |
|-------------------------|--------------------------------------------|----------------------------------------------------|
| <i>Gorai.005G088800</i> | root up-regulated                          | F:CCCAAATGGAAGGAAGAA<br>R:GCATCTGTGAAGCAAATC       |
| <i>Gorai.010G219200</i> | root up-regulated                          | F:TTATCTCTTCTGCTCCTT<br>R:AGTATCCATAGTTCTTATCAC    |
| <i>Gorai.012G098700</i> | root up-regulated                          | F:TTCAGGCATCAACATCTA<br>R:AGAATCCATAGTCAGCAAT      |
| <i>Gorai.013G186800</i> | root up-regulated                          | F:ACTTGCACTTGAATCAC<br>R:CTCACTTCATCGTCTCTA        |
| <i>Gorai.011G106000</i> | root up-regulated                          | F:TAATAACTCGGCTTCTCT<br>R:CCACAATTCTCAACAGTA       |
| <i>Gorai.013G002500</i> | root up-regulated                          | F:CACCGAAGATGAATGAAT<br>R:GGATTACACATATTACCAAGA    |
| <i>Gorai.009G240400</i> | root up-regulated                          | F:GAGTACATCTCCGACTTG<br>R:CACAACCTTACAATCCA        |
| <i>Gorai.009G425300</i> | root up-regulated                          | F:GGTGTATGATGTTGTTAGG<br>R:TCACTATATCCTCCCAAC      |
| <i>Gorai.009G055400</i> | root up-regulated                          | F:CTTCCATATCATTTCCTTATC<br>R:CTTGTTGTAGCGAATCTT    |
| <i>Gorai.010G249700</i> | root up-regulated                          | F:CAACAATCGTGCTTCAA<br>R:CACTATGCCTGTATGCTA        |
| <i>Gorai.010G144000</i> | root up-regulated                          | F:GTCAACCTTACTCTCACT<br>R:CATCATTATCATCACCAAGT     |
| <i>Gorai.013G264800</i> | root no difference                         | F:AGTGTGATATGCTGTAT<br>R:AATCATCTTGCTTCTCAC        |
| <i>Gorai.013G260200</i> | root no difference                         | F:AGAAATTGGCTCCTGAAA<br>R:CGGCGTAAGTTTATGTA        |
| <i>Gorai.013G229600</i> | root no difference                         | F:CTTGAATGTGCTATTGGA<br>R:AGAGAATTGATCTGATGGA      |
| <i>Gorai.005G259200</i> | root no difference                         | F:TTACAGAAGCACCCTAA<br>R:GCCTGAATAGCAACATAC        |
| <i>Gorai.004G144900</i> | root no difference                         | F:CTGTCAATGATGAACCTATT<br>R:GCTCTGTCTCTTCTGATT     |
| <i>Gorai.007G228300</i> | root no difference                         | F:TTATGAAACGGCGAAATGG<br>R:TATGGAGGAGGCTCTTCA      |
| <i>Gorai.011G281100</i> | root no difference                         | F:ACTATGTTGATCTATTGGTGTT<br>R:CACTCCTTCACTTGTAAACC |
| <i>Gorai.001G088900</i> | root no difference                         | F:CCAGAGGTATTGAAGAAG<br>R:GGAAGTAGAAGAGGAATTG      |
| <i>Gorai.001G177100</i> | root no difference                         | F:TACGCTGGACTAACTATT<br>R:TAGCCGACCATCTATTAC       |



---

|                         |                     |                                                    |
|-------------------------|---------------------|----------------------------------------------------|
| <i>Gorai.001G199400</i> | root no difference  | F:AATTAGAACAAGGAGACAATAAG<br>R:CAACGCTCATTAACAGATT |
| <i>Gorai.001G068900</i> | root no difference  | F:TTGCTATGGATGCTTGAT<br>R:GGTGGGAGAACATATAACT      |
| <i>Gorai.003G119400</i> | root down-regulated | F:TGAAGGATATGAACATTGC<br>R:CTGAGCCGATAATTGAAG      |
| <i>Gorai.010G022800</i> | root down-regulated | F:AGGTTACAGTCGTTGGAT<br>R:GTCCATACTTAGCACTTC       |
| <i>Gorai.004G233300</i> | root down-regulated | F:ATCCATTGAACTTATATGATGAA<br>R:TTGCCTTCTTCTCACATT  |
| <i>Gorai.007G007800</i> | root down-regulated | F:GAAGGAAGAGGAGGAGAT<br>R:TATCGTAATAGATCACACCTG    |
| <i>Gorai.005G102700</i> | root down-regulated | F:TGACCAAGGAAGAGATAA<br>R:CGCATCCATCTTTATTG        |
| <i>Gorai.008G237900</i> | root down-regulated | F:TCAGCAATCCTACTTCTC<br>R:GCAAACATTCACGTTATTC      |
| <i>Gorai.005G088000</i> | root down-regulated | F:TTCATCAGAGTTCTATAAGGT<br>R:ATCCACATTCTCCAATT     |
| <i>Gorai.005G074600</i> | root down-regulated | F:TTTCATGGAAGCCAAAGA<br>R:ATCTGTGAGTAGCAATGG       |
| <i>Gorai.005G185500</i> | root down-regulated | F:GAGGTTATGGAGTTCTAA<br>R:GATTGGTAGGACTCTGAA       |
| <i>Gorai.007G027400</i> | root down-regulated | F:ATGCTCTTAAATTAGGTGTATG<br>R:AACGAGACCATTGAGAAG   |
| <i>Gorai.011G137300</i> | leaf up-regulated   | F:TTGATTCCTTCCCGATT<br>R:TCCTGTTCTTCTGTATGG        |
| <i>Gorai.012G003400</i> | leaf up-regulated   | F:GAGACGATGATGAATATAACC<br>R:ATGATGGAGAGGACAATG    |
| <i>Gorai.007G318400</i> | leaf up-regulated   | F:TTAGTTTGTGTTCTCTTAGC<br>R:CACATTCATTCCTTTGC      |
| <i>Gorai.013G271900</i> | leaf up-regulated   | F:GGATTGATGATGCTGTTG<br>R:ATGGAATAAGGAGGTATGTG     |
| <i>Gorai.002G250500</i> | leaf up-regulated   | F:TGCTTTCAGGCTATAAATC<br>R:TTCCATCTCTCCACTAC       |
| <i>Gorai.001G031100</i> | leaf up-regulated   | F:CCTATCATCCTGTTACTG<br>R:TTGTAGATTCTTCATCCATA     |
| <i>Gorai.004G235900</i> | leaf up-regulated   | F:TTCTTGTTGTGAGGTTGT<br>R:TTAAGGCTAGTCTCCATC       |
| <i>Gorai.006G245900</i> | leaf up-regulated   | F:CCAGAGTTGTTACAGGTT<br>R:TTGTCTTCATAAGTAGGTTCA    |
| <i>Gorai.010G215600</i> | leaf up-regulated   | F:ACCTCCATTGATGTATTGT<br>R:ACCCATTCAGTGCTAAT       |

---

---

|                         |                     |                                                    |
|-------------------------|---------------------|----------------------------------------------------|
| <i>Gorai.004G068200</i> | leaf up-regulated   | F:TTACGAGGCTCATTATCT<br>R:TCCATCTGTTCTTGTCTA       |
| <i>Gorai.002G248000</i> | leaf up-regulated   | F:CTGCTATAATGGAACATATACTTG<br>R:AATGCGTAACGATCTTGT |
| <i>Gorai.001G002700</i> | leaf no difference  | F:AAGACAAGAACTTCAACTAC<br>R:GCAGCAATACGGTAATAG     |
| <i>Gorai.001G084000</i> | leaf no difference  | F:GATTGGCTTATTCTTGTATTG<br>R:AACAGGAACCGTATTACT    |
| <i>Gorai.013G090200</i> | leaf no difference  | F:ACGAAGTTGGGTAGATG<br>R:TAACAGTCCGATGTGAAG        |
| <i>Gorai.003G009500</i> | leaf no difference  | F:CAAGCGAGAAGTCAAGATA<br>R:CCTCACATAACTCCATAACA    |
| <i>Gorai.009G295900</i> | leaf no difference  | F:TCAGGAATTGGAGTGGAT<br>R:TCAATGAACAACCTGGAAC      |
| <i>Gorai.009G288900</i> | leaf no difference  | F:AAGCAGAATCCATTGAAG<br>R:AATCTAACTCTTGACTATTACC   |
| <i>Gorai.003G056300</i> | leaf no difference  | F:TCATGTTGCCTGTGTAT<br>R:TTCTATTCCCTGCCTTC         |
| <i>Gorai.001G089400</i> | leaf no difference  | F:CTGTTGTGTTGATTGACT<br>R:TGTGATGAAGCAAGTAAC       |
| <i>Gorai.001G118900</i> | leaf no difference  | F:ACGATGATAGTGACAAGAG<br>R:AGTGTAGATTCAAGCAAGT     |
| <i>Gorai.006G025300</i> | leaf no difference  | F:TTGGAAGTGAACCTACTC<br>R:AACCTGGTCAATATCTTC       |
| <i>Gorai.006G212100</i> | leaf down-regulated | F:GATACATCGAGAATCCATAG<br>R:TCCATCACCTTAGTAGAC     |
| <i>Gorai.013G186800</i> | leaf down-regulated | F:AATGGAGAAAGTTTATCAGT<br>R:CTTCACCTTCTTCACTATC    |
| <i>Gorai.011G245400</i> | leaf down-regulated | F:GTTGTTGCTTGTTCATAG<br>R:CAATACACTTATCACC AATG    |
| <i>Gorai.012G037600</i> | leaf down-regulated | F:ATGACGAATTGGTGAATC<br>R:CATACAACGCCATATCTG       |
| <i>Gorai.013G186800</i> | leaf down-regulated | F:AATGGAGAAAGTTTATCAGT<br>R:CTTCACCTTCTTCACTATC    |
| <i>Gorai.001G091300</i> | leaf down-regulated | F:TACTCCAGATGATAAATGTG<br>R:TTCCCTTACAATGTTTAC     |
| <i>Gorai.013G092300</i> | leaf down-regulated | F:TATGACCAAGAGTGAAGT<br>R:CAGCGATAGTAACTCCTA       |
| <i>Gorai.004G140800</i> | leaf down-regulated | F:TCATGTTGCCTGTGTAT<br>R:TTCTATTCCCTGCCTTC         |
| <i>Gorai.001G180600</i> | leaf down-regulated | F:GGAACAGAATGAGGATAATG<br>R:GCACATAAAGTCCCAAAG     |

---

---

|                         |                     |                                               |
|-------------------------|---------------------|-----------------------------------------------|
| <i>Gorai.007G202300</i> | leaf down-regulated | F:CATTCTCTCAGTTCTTCAC<br>R:TATTAATCCAGCGGTCAG |
| <i>Gorai.009G300600</i> | leaf down-regulated | F:CAAGGCTCTCATTATACG<br>R:TACACAAGACCAACAATT  |

---

**Table S7. Primers used for validation of alternative splicing**

| Gene ID                 | AS pattern | Primers for RT-PCR(5'-3')                             | Primers for qRT-PCR(5'-3')                         |
|-------------------------|------------|-------------------------------------------------------|----------------------------------------------------|
| <i>Gorai.007G304100</i> | AA         | F:TTCTAGCCGCATTGCCTTT<br>R:CGACGAGAGCAAGCGATCA        | F:AAGGAGAGGAGATATAGAGAA<br>R:TCGTAATTCAAACAGAAATCC |
| <i>Gorai.008G004200</i> | ES         | F:ATGAGTCGCCTGCCAGAG<br>R:TATCTGGTATCTGTTATTACCGCTT   | F:GTGAGCTATGTTTCGATCTTCT<br>R:GGTGTGTCGTCGGAATA    |
| <i>Gorai.008G047400</i> | MEE        | F:CTGAAAGCTCTTCTCCCATGC<br>R:TATGAACCACTTTCTGGAGGAGAG | F:GTGAGCTATGTTTCGATCTTCT<br>R:GGTGTGTCGTCGGAATA    |
| <i>Gorai.008G263000</i> | AD         | F:TTTGGTAAGCAGTATCTGATTCTCA<br>R:TCACTGTCCCCTCGCCAG   | F:TCTTCCAATACCGTTTCAG<br>R:CAGATGCTAATCAAGTGTT     |
| <i>Gorai.002G147600</i> | IR         | F:AACACTTCGAATCGTTTTCCA<br>R:AATCTTGGCTTTCACATTATCAA  | F:AAGCAGTATCTGATTCTC<br>R:TCAACGGTAATAGACATT       |

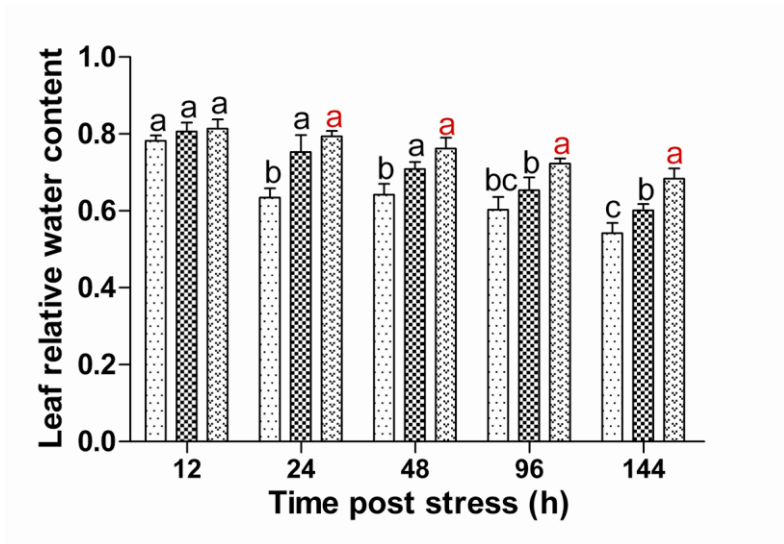

**Figure S1.** Leaf relative water content in *G. davidsonii* and *G. hirsutum*

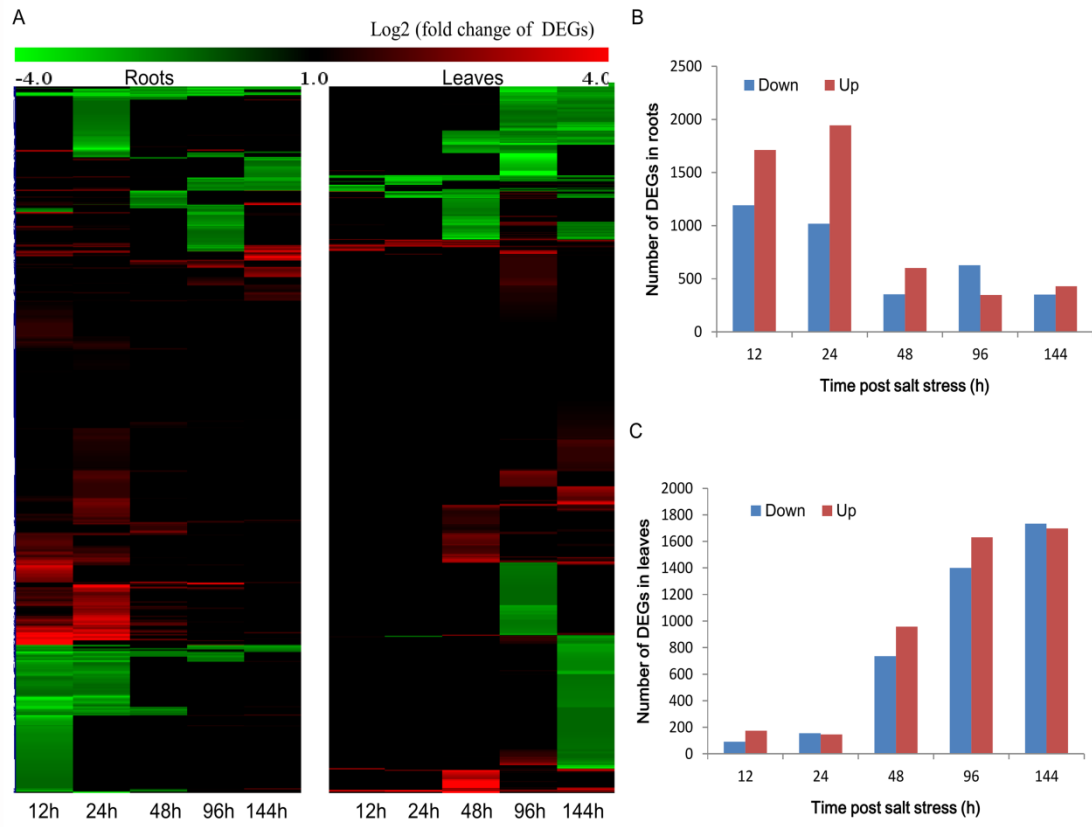

**Figure S2.** Number of DEGs in roots and leaves.

A, Heat map of total DEGs in response to salt stress in roots and leaves. B, Number of DEGs in roots. C, Number of DEGs in leaves.

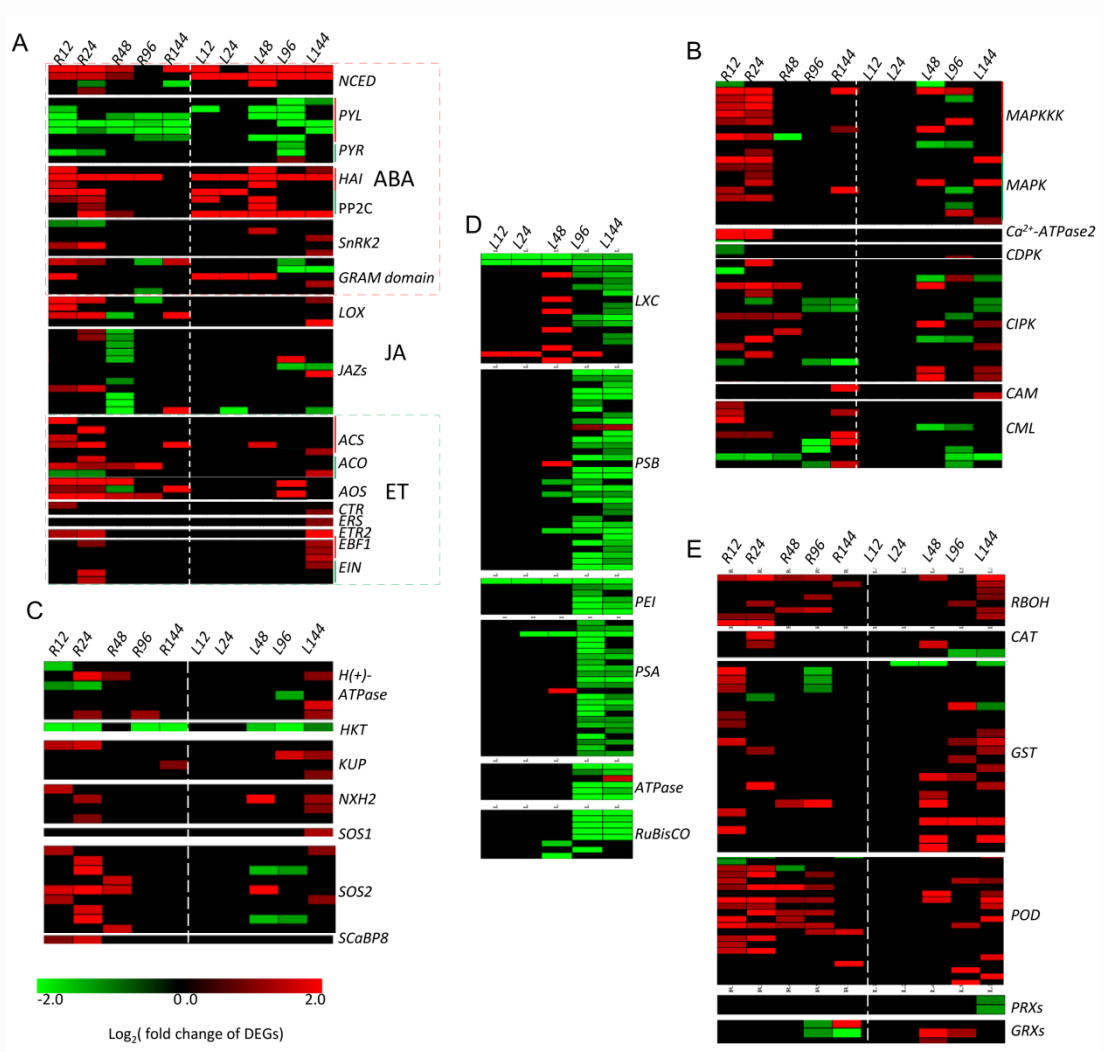

**Figure S3.** Expression profiling of hormone (A), MAPK cascade and Ca<sup>2+</sup>-related kinase (B), ion homeostasis (C), Photosynthesis (D) and ROS (E) related genes.

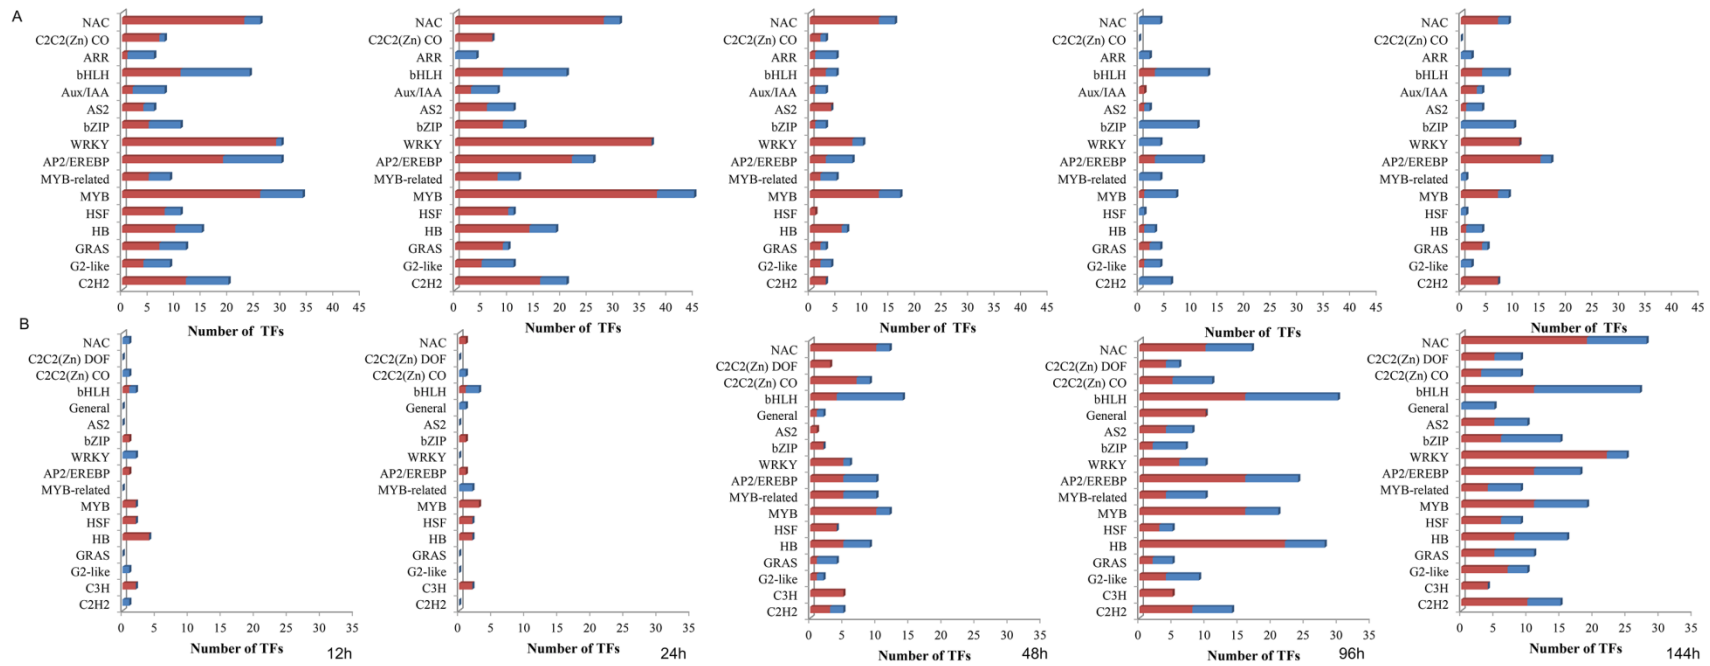

**Figure S4.** DEGs of transcription factors in response to salt stress. A, TFs of roots; B, TFs of leaves.



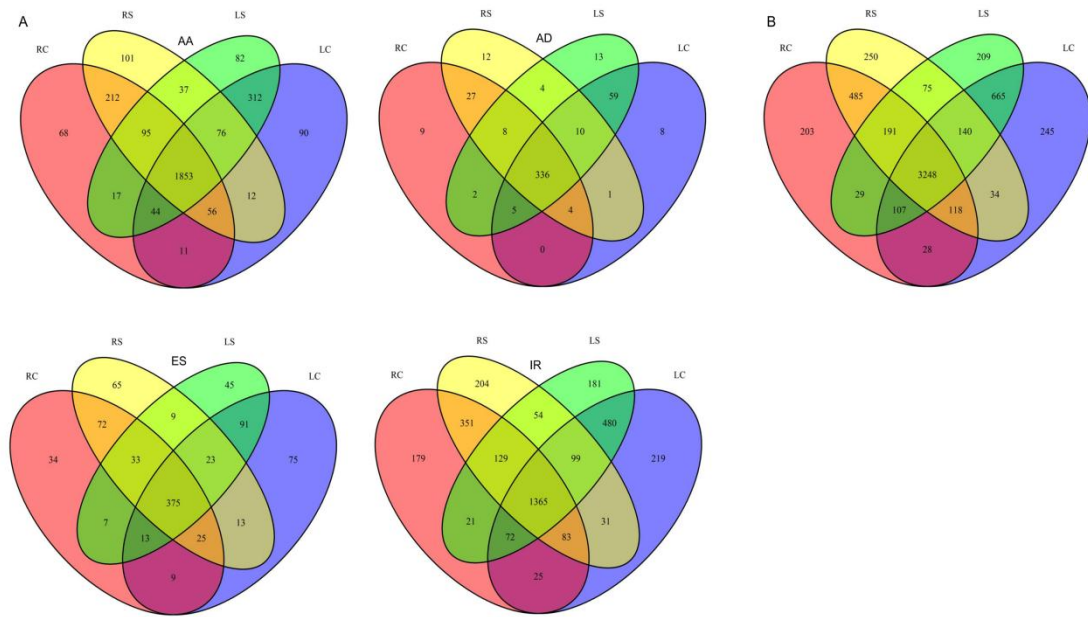

**Figure S5.** Novel alternative splicing in roots and leaves under salt stress conditions, detected by RNA-Seq.

A, Four main alternative splicing patterns and number of various events in roots and leaves under salt stress and normal conditions. B, Total alternative splicing events in roots and leaves, respectively.
